# Supplementary material for: Genome-Wide Scan for Runs of Homozygosity Identifies Candidate Genes in Three Pig Breeds
Source: PubMed Central journal article supplement (PMC6720638; doi:10.3390/ani9080518), 2019-08-01
Supplement: animals-09-00518-s001.pdf [file animals-09-00518-s001.pdf]

**Additional Table 1** Candidate genes located in genomic regions with a high frequency of ROH

| Population | Chromosome | Position(Mb)  | Number. of SNP | Gene name                                                                                                                                                                               |
|------------|------------|---------------|----------------|-----------------------------------------------------------------------------------------------------------------------------------------------------------------------------------------|
| Landrace   | 7          | 57.62~58.77   | 21             | <i>RPS17,FURIN,HDDC3,RCCD1,WHAMM,FES,MAN2A2,UNC45A,UROCI,ZXDC,CPEB1,PDE8A,FSD2,SLC41A3</i>                                                                                              |
|            |            |               |                | <i>ACAN,HAPLN3,FANCI,POLG,MFGE8,ABHD2,RHCG,RLBP1</i>                                                                                                                                    |
|            | 7          | 62.40~64.65   | 17             | <i>IMP3,NEIL1,COMMD4,C15orf39,RPP25,MPI,CPLX3,LMAN1L,CYP1A1,ISLR,C15orf59,SNUPN,MAN2C1,PPCDC,SCAMP5,COX5A,FAM219B,SCAMP2,ULK3,CYP1A2,CLK3,PML,STOML1,NPTN,HCN4,PTPN9,CSK,EDC3,SIN3A</i> |
|            |            |               |                | <i>MNI,PITPNB,TTC28</i>                                                                                                                                                                 |
| Songliao   | 7          | 57.55~58.77   | 24             | <i>RPS17,FURIN,HDDC3,RCCD1,WHAMM,FES,MAN2A2,UNC45A,UROCI,ZXDC,HOMER2,CPEB1,PDE8A,FSD2,SLC41A3</i>                                                                                       |
|            |            |               |                | <i>GPR33,GZMB,AP4S1,SCFD1,NOVA1,HEATR5A</i>                                                                                                                                             |
|            | 7          | 71.28~80.08   | 91             | <i>HECTD1,G2E3,STXBP6</i><br><i>CRYBB1,CRYBA4,ZNRF3,RHBDD3,GAS2L1,</i>                                                                                                                  |
| Yorkshire  | 14         | 45.86~50.03   | 114            | <i>RASL10A,UQCR10,CRYBB3,CRYBB2,SEZ6L,HP S4,SRRD,TFIP11,TPST2,MNI,EMID1,EWSR1,AP1B1,NIPSNAP1,KIAA1671,MYO18B,ASPHD2,PITPNB,MTMR3,GRK3,TTC28,KREMEN1</i>                                 |
|            |            |               |                | <i>ONECUT2,SUMO1,POLI,C18orf54,RAB27B,</i>                                                                                                                                              |
|            | 1          | 112.05~118.03 | 79             | <i>CCDC68,TXNL1,FECH,NARS,MTFMT,SPG21,PIF1,MBD2,WDR7,ANKDD1A</i>                                                                                                                        |
| Yorkshire  | 1          | 120.25~124.07 | 63             | <i>ANXA2,RORA,ICE2</i>                                                                                                                                                                  |
|            |            |               |                | <i>EID1,DUOXA2,COPS2,SECISBP2L,SLC12A1,MYEF2,SLC24A5,SEMA6D,SQRDL,GATM,</i>                                                                                                             |
|            | 1          | 135.63~141.36 | 64             | <i>C15orf48,SLC28A2,DUOX1,DUOXAI,DUOX2,TERB2,DTWD1,GALK2,SHC4,CEP152,FBN1,SLC30A4,SPATA5L1,SHF,SORD</i>                                                                                 |

|    |              |     |                                               |
|----|--------------|-----|-----------------------------------------------|
| 4  | 41.58~42.18  | 12  | <i>RPL30,ERICH5,LAPTM4B,MTDH,POP1,RIDA</i>    |
| 4  | 77.27~78.13  | 8   | <i>GGH</i>                                    |
| 4  | 79.61~81.08  | 10  | <i>NSMAF,TOX</i>                              |
| 4  | 82.39~82.61  | 9   | <i>SDR16C5,PLAG1</i>                          |
|    |              |     | <i>RGS4,CCDC190,SPATA46,SH2D1B,FCRLB,</i>     |
|    |              |     | <i>CFAP126,MPZ,PCP4L1,NR1I3,APOA2,FCER1G</i>  |
|    |              |     | <i>,PPOX,USP21,NIT1,TSTD1,USF1,NHLH1,</i>     |
|    |              |     | <i>PEA15,PIGM,KCNJ10,SLAMF9,TAGLN2,VSIG8</i>  |
|    |              |     | <i>,FCRL6,DUSP23,CRP,CRP,OR10J5,</i>          |
|    |              |     | <i>LOC100517891,OR10J3,OR10J1,OR6N1,OR6K6</i> |
|    |              |     | <i>,OR6K3,OR6K2,OR10Z1,OR6P1,OR6Y1,CD1A,</i>  |
| 4  | 94.73~100.30 | 107 | <i>HSD17B7,UAP1,FCGR2B,TOMM40L,NDUFS2,</i>    |
|    |              |     | <i>B4GALT3,UFC1,DEDD,PFDN2,PVRL4,F11R,</i>    |
|    |              |     | <i>SLAMF7,LY9,CD244,CD48,CD84,SLAMF6,</i>     |
|    |              |     | <i>VANGL2,NCSTN,PEX19,CASQ1,ATP1A4,IGSF8,</i> |
|    |              |     | <i>KCNJ9,CFAP45,FCER1A,CADM3,OR10K2,</i>      |
|    |              |     | <i>NUF2,RGS5,DDR2,SDHC,ADAMTS4,</i>           |
|    |              |     | <i>ARHGAP30,SLAMF1,COPA,ATP1A2,SLAMF8,</i>    |
|    |              |     | <i>ACKR1,OR6N2,OLFML2B</i>                    |
|    |              |     | <i>VPS52,B3GALT4,WDR46,PFDN6,TAPBP,ZBTB2</i>  |
|    |              |     | <i>2,DAXX,BAK1,ZBTB9,PHF1,HMGA1,RPS18,</i>    |
|    |              |     | <i>RGL2,</i>                                  |
| 7  | 33.74~35.73  | 38  | <i>SYNGAP1,CUTA,UQCC2,LEMD2,MLN,SPDEF</i>     |
|    |              |     | <i>,PACSINI,SNRPC,TAF11,ITPR3,GRM4,</i>       |
|    |              |     | <i>UHRF1BP1,ANKS1A,DST</i>                    |
|    |              |     | <i>RAB44,PII6,PIMI,TMEM217,STK38,PPIL1,</i>   |
| 7  | 37.13~37.98  | 12  | <i>C6orf89,MTCH1,FGD2,RNF8,CPNE5</i>          |
|    |              |     | <i>ZNRF3,RHBDD3,GAS2L1,RASL10A,MN1,EMID</i>   |
| 14 | 47.26~49.72  | 61  | <i>1,EWSR1,AP1B1,NIPSNAP1,PITPNB,TTC28,</i>   |
|    |              |     | <i>KREMEN1</i>                                |

---
